# Supplementary material for: Bio-inspired construction of melanin-like polydopamine-coated CeO2 as a high-performance visible-light-driven photocatalyst for hydrogen production
Source: Royal Society of Chemistry journal article supplement (doi:10.1039/d0nj02234a), 2020-01-01
Supplement: d0nj02234a1.pdf [file d0nj02234a1.pdf]

## Bio-inspired construction of melanine like polydopamine coated CeO<sub>2</sub> as a high performance visible light driven photocatalyst for hydrogen production

M. Sridharan,<sup>a</sup> P. Kamaraj,<sup>b,\*</sup> R. Vennila,<sup>c</sup> Yun Suk Huh,<sup>d</sup> M. Arthanareeswari,<sup>a</sup>

<sup>a</sup> Department of Chemistry, SRM Institute of Science and Techonology, Kattankulathur, Chennai, India.

<sup>b</sup> Department of Chemistry, Bharath Institute of Higher Education and Research, Chennai, India.

<sup>c</sup> Department of Chemistry, Adhiyaman arts & science college for women, Krishnagiri, India.

<sup>d</sup> Department of Biological Engineering, College of Engineering, Inha university, Incheon, Korea.

| S.No | Catalyst used                                     | Light source           | Hole scavengers                                         | H <sub>2</sub> production rate (μmol·g <sup>-1</sup> ·h <sup>-1</sup> ) | Refer               |
|------|---------------------------------------------------|------------------------|---------------------------------------------------------|-------------------------------------------------------------------------|---------------------|
| 1    | CdSQDs@CeO <sub>2</sub>                           | 300W xe Lamp           | Na <sub>2</sub> SO <sub>3</sub> and Na <sub>2</sub> S   | 101.1                                                                   | S1                  |
| 2    | NiP decorated CeO <sub>2</sub> @TiO <sub>2</sub>  | 1000mW/cm <sup>2</sup> | -                                                       | 260                                                                     | S2                  |
| 3    | CeO <sub>2</sub> @Carbon nanostructure            | 300W xe Lamp           | Methanol                                                | 582                                                                     | S3                  |
| 4    | g-C <sub>3</sub> N <sub>4</sub> @CeO <sub>2</sub> | 300W xe Lamp           | Triethanolamine                                         | 860                                                                     | S4                  |
| 5    | g-C <sub>3</sub> N <sub>4</sub> @CeO <sub>2</sub> | 300W xe Lamp           | Triethanolamine                                         | 1100                                                                    | S5                  |
| 6    | Flower like g-C <sub>3</sub> N <sub>4</sub> @PDA  | 300W xe Lamp           | Triethanolamine                                         | 1256                                                                    | S6                  |
| 7    | <b>CeO<sub>2</sub>@PDA</b>                        | <b>300W xe Lamp</b>    | <b>Na<sub>2</sub>SO<sub>3</sub> and Na<sub>2</sub>S</b> | <b>1500</b>                                                             | <b>Present work</b> |

Table S1. Comparison of photocatalytic activity

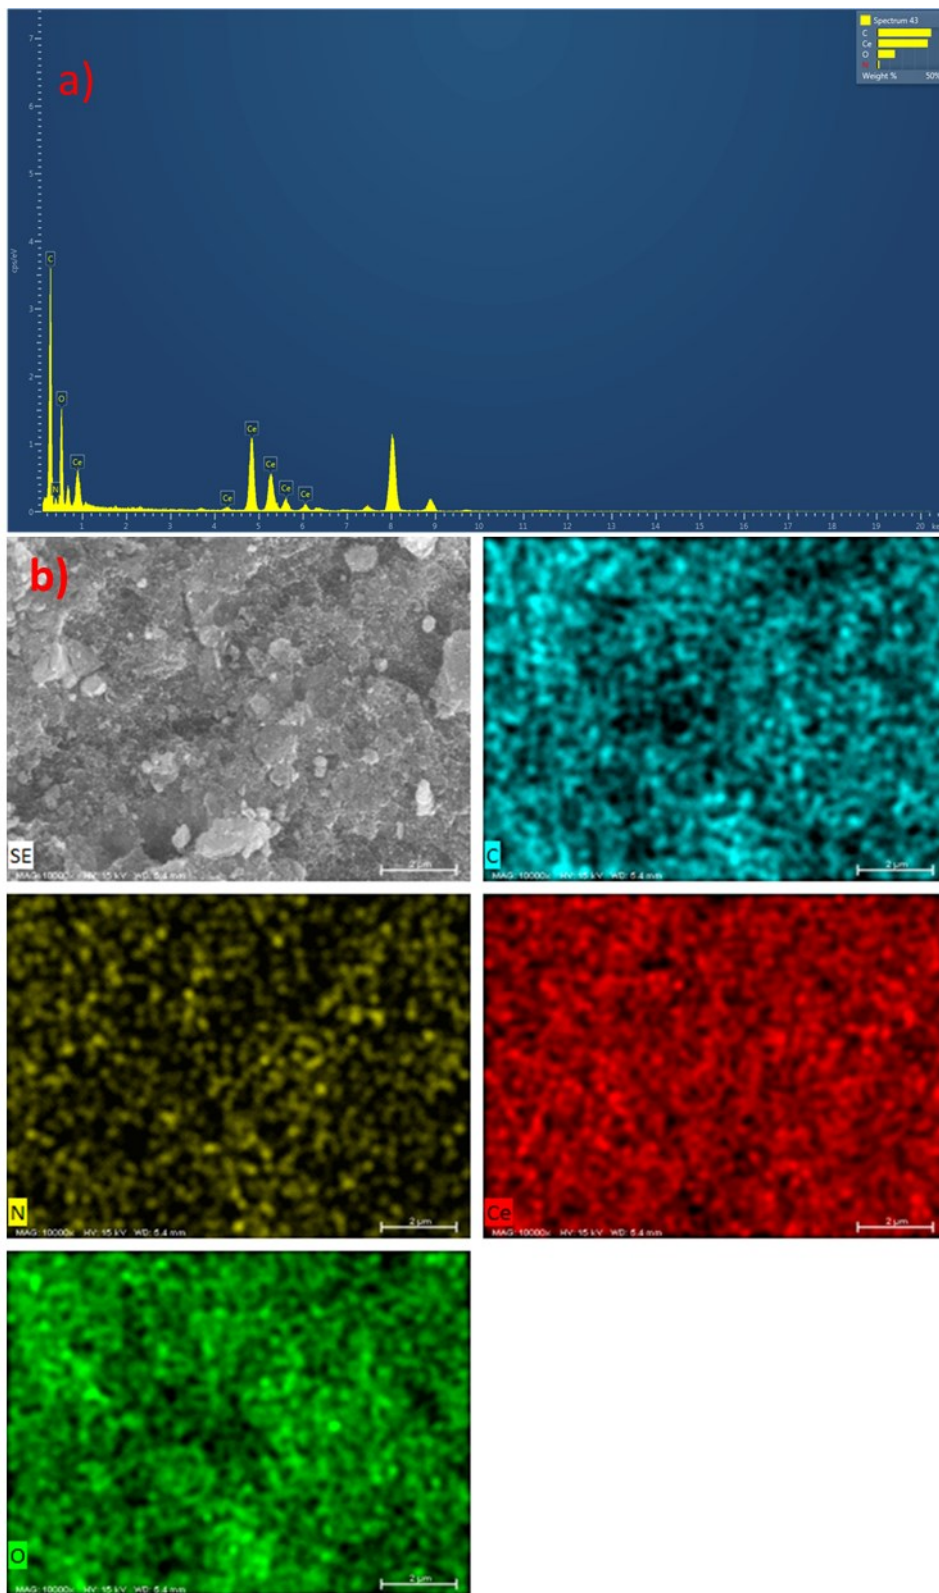

Figure S1. (a) EDS pattern of CeO<sub>2</sub>@PDA-C composite and (b) EDS mapping of CeO<sub>2</sub>@PDA-C composite

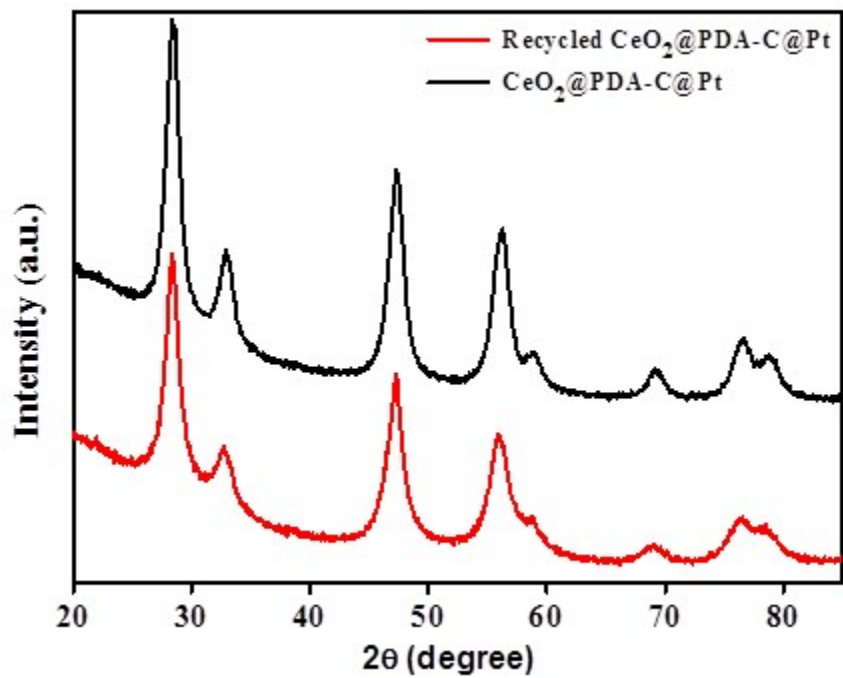

Figure S2. XRD pattern of the CeO<sub>2</sub>@PDA-C@Pt composite before (a) and after (b) photoreaction

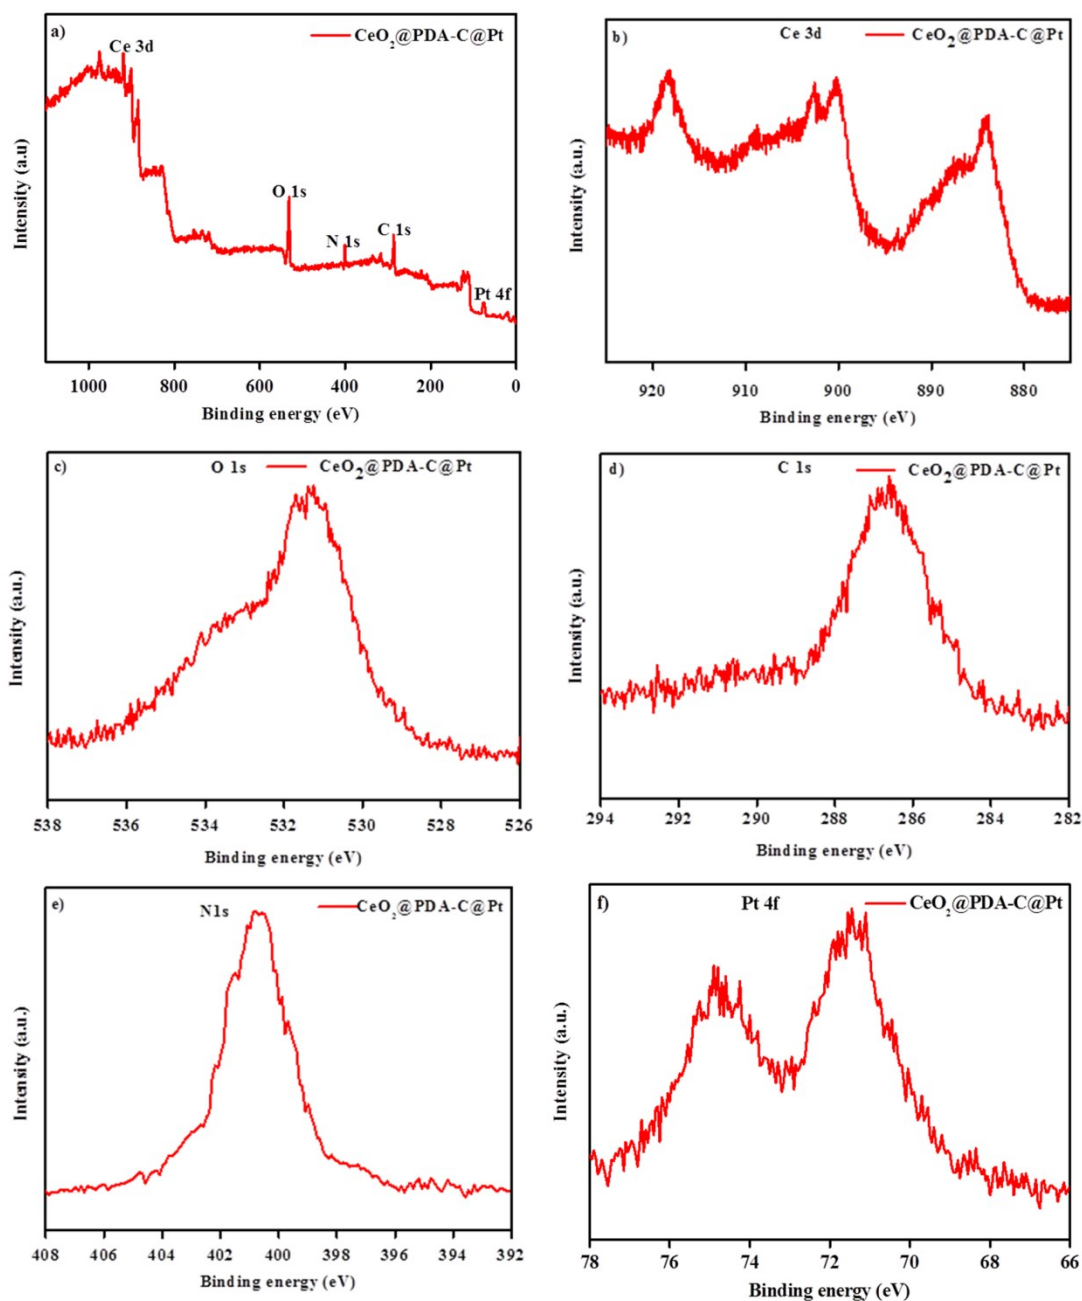

**Figure S3. (a) XPS survey spectra of  $\text{CeO}_2@\text{PDA-C@Pt}$  nanocomposite, high resolution XPS spectra of Ce 3d (b); O 1s (c); C 1s (d) N 1s (e) and Pt 4f (f).**

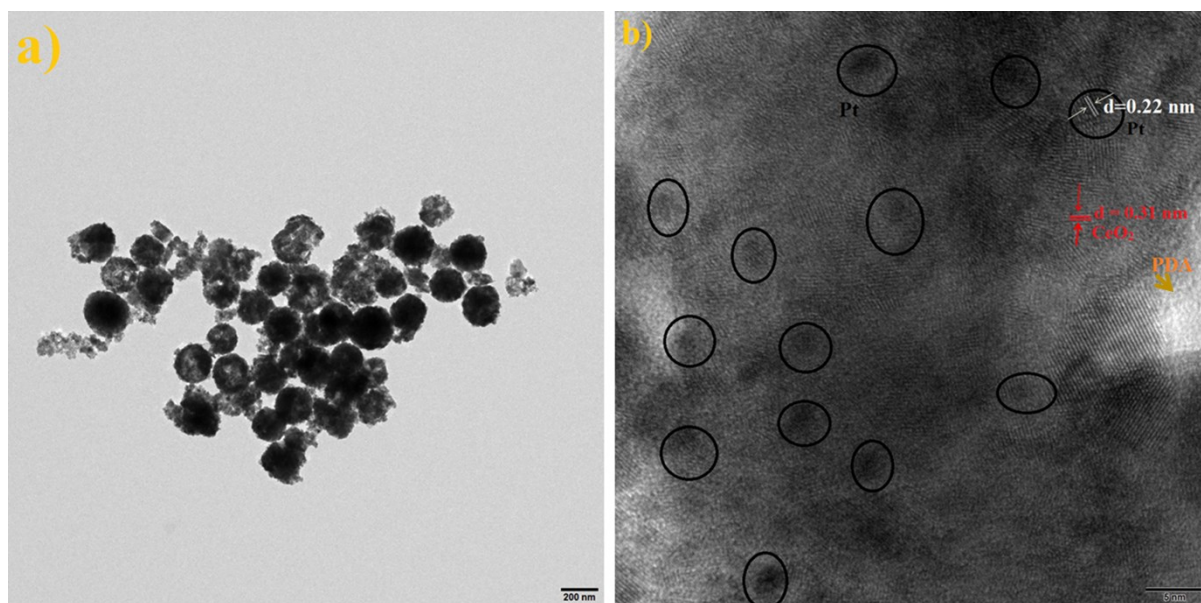

**Figure S4. (a) TEM image and (b) HRTEM image of CeO<sub>2</sub>@PDA-C@Pt**

### References

(S1) Y. Ma, Y. Bian, Y. Liu, A. Zhu, H. Wu, H. Cui, D. Chu, J. Pan, Construction of Z-scheme System for Enhanced Photocatalytic H<sub>2</sub> Evolution Based on CdS Quantum Dots/CeO<sub>2</sub> Nanorods Heterojunction. *ACS Sustainable ChemEng.*, **2018**, *6*, 2552-2562, DOI: org/10.1021/acssuschemeng.7b04049.

(S2) M. A. Sha, P.C. Meenu, V.S. Sumi, T.C. Bhagya, B. R. Sreelekshmy, S. M. A. Shilbia, Tuning of electron transfer by Ni-P decoration on CeO<sub>2</sub>/TiO<sub>2</sub> heterojunction for enhancement in photocatalytic hydrogen generation. *Materials Science in Semiconductor Processing*. **2020**, *105*, 104742. DOI: org/10.1016/j.mssp.2019.104742.

(S3) J. Qian, Z. Chen, H. Sun, F. Chen, X. Xu, Z. Wu, P. Li, and W. Ge, Enhanced photocatalytic H<sub>2</sub> production on three dimensional porous CeO<sub>2</sub>/Carbon nanostructure *ACS Sustainable Chem. Eng.* **2018**, *6*, 8, 9691-9698. DOI: org/10.1021/acssuschemeng.8b00596.

(S4) Weixin Zou, Ye Shao, Yu Pu, Yidan Luo, Jingfang Sun, Kali Ma, Changjin Tang, Fei Gao, Lin, Enhanced visible light photocatalytic hydrogen evolution via cubic CeO<sub>2</sub> hybridized g-C<sub>3</sub>N<sub>4</sub>. *Appl. Catal. B*, **2017**, *218*, 51-59. DOI: org/10.1016/j.apcatb.2017.03.085.

(S5) Weixin Zou, Biao Deng, Xixi Hu, Yipeng Zhou, Yu Pu, Shuohan Yu, Kaili Ma, Jingfang Sun, Haiqin Wan, Lin, Crystal-plane-dependent metal oxide-support interaction

in CeO<sub>2</sub>/g-C<sub>3</sub>N<sub>4</sub> for photocatalytic hydrogen evolution, *Appl. Catal. B*, **2018**, 238, 111-118. DOI: [org/10.1016/j.apcatb.2018.07.022](https://doi.org/10.1016/j.apcatb.2018.07.022).

(S6) H. Wang, Q. Lin, L. Yin, Y. Yang Qiu, C. Lu, H. Yang, Biomimetic Design of Hollow Flower-Like g-C<sub>3</sub>N<sub>4</sub>@PDA Organic Framework Nanospheres for Realizing an Efficient Photoreactivity. *Small*. **2019**, 15, e19001. DOI:[org/10.1002/sml.201900011](https://doi.org/10.1002/sml.201900011)
